# Supplementary material for: The Role of Mineral Assemblages in The Environmental Impact of Cu-Sulfide Deposits: A Case Study from Norway
Source: MDPI journal article supplement (doi:10.3390/min11060627), 2021-06-12
Supplement: s1 [file s1]

Archive with 1 entries (1 files):
- minerals-1262374-supplementary.pdf
